# Supplementary material
Source: Springer Nature journal article supplement (https://www.springermedizin.de/resource/supplementary/12885_2011_3270_MOESM10_ESM.pdf/9463072)
Supplement: MOESM10 [file 9463072]

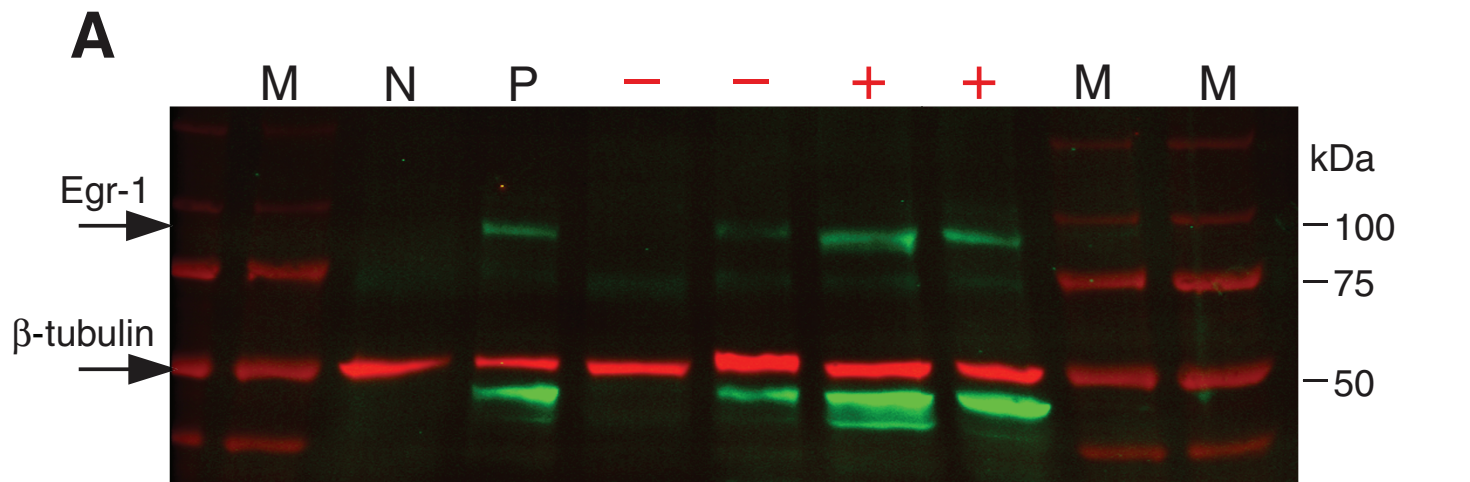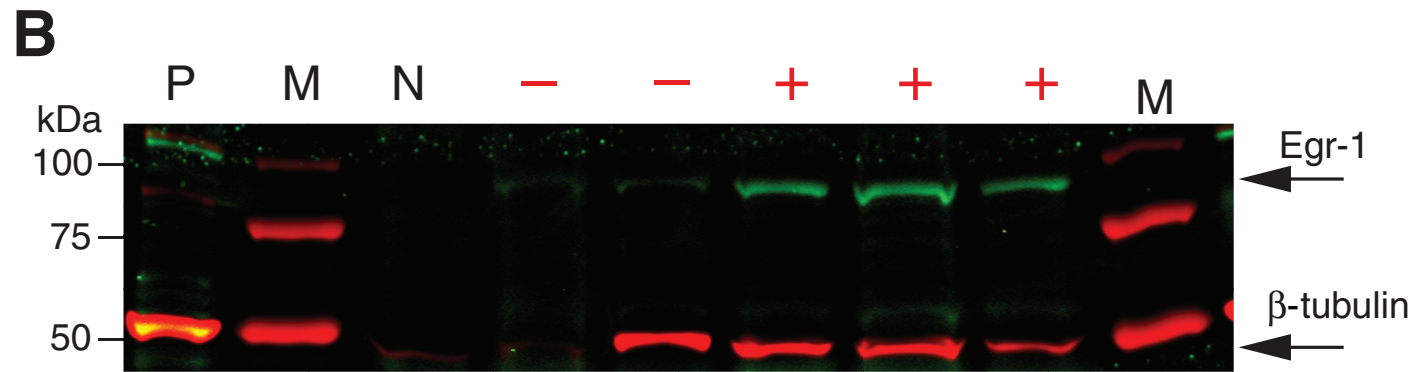

M - coomassie-blue prestained protein marker (Bio-RAD)  
 P - positive control (3T3 cell lysate, Santa Cruz)  
 N - negative control (293T cell lysate, Santa Cruz)  
 “-” - no cachexia (biopsy protein lysate)  
 “+” - cachexia (biopsy protein lysate)
